# Supplementary material
Source: Springer Nature journal article supplement (https://www.springermedizin.de/resource/supplementary/12936_2007_420_MOESM2_ESM.pdf/9547410)

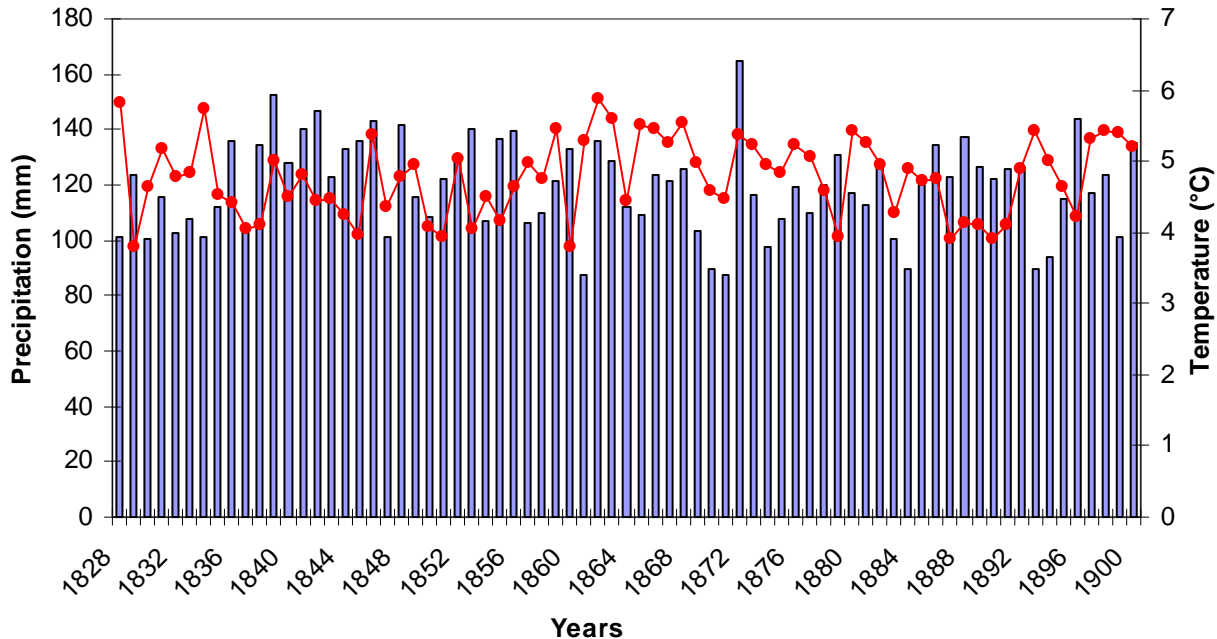

■ Mean annual precipitation in Albertville

● Mean annual temperature in Albertville

Supplement: MOESM2 [file 9547410]
